# Supplementary material for: Using frustrated Lewis pairs to explore C–F bond activation
Source: Royal Society of Chemistry journal article supplement (doi:10.1039/c9dt04588k), 2019-12-23
Supplement: c9dt04588k1.pdf [file c9dt04588k1.pdf]

# Supporting information

## Using Frustrated Lewis pairs to explore C-F bond activation

Alvaro I. Briceno-Strocchia, Timothy C. Johnstone, and Douglas W. Stephan

### Contents

|                                                                                                                                                                                                                      |   |
|----------------------------------------------------------------------------------------------------------------------------------------------------------------------------------------------------------------------|---|
| Supporting information .....                                                                                                                                                                                         | 1 |
| [PhC(O)CF <sub>2</sub> C(OSiMe <sub>2</sub> tBu)CF <sub>3</sub> Ph] <b>1</b> .....                                                                                                                                   | 3 |
| Figure S1: <sup>1</sup> H NMR (500 MHz, CDCl <sub>3</sub> ) spectrum of <b>1</b> .....                                                                                                                               | 3 |
| Figure S2: <sup>13</sup> C NMR (100 MHz, CDCl <sub>3</sub> ) spectrum of <b>1</b> .....                                                                                                                              | 3 |
| Figure S3: <sup>19</sup> F{ <sup>1</sup> H} NMR (377 MHz, CDCl <sub>3</sub> ) spectrum for <b>1</b> .....                                                                                                            | 4 |
| [PhC(CF <sub>2</sub> )OP(MeNCH <sub>2</sub> CH <sub>2</sub> ) <sub>3</sub> N][BFPh <sub>3</sub> ] <b>2</b> .....                                                                                                     | 4 |
| Figure S4: <sup>1</sup> H NMR (500 MHz, CDCl <sub>3</sub> ) spectrum of <b>2</b> .....                                                                                                                               | 4 |
| Figure S5 : <sup>13</sup> C NMR (100 MHz, CDCl <sub>3</sub> ) spectrum of <b>2</b> .....                                                                                                                             | 5 |
| Figure S6: <sup>19</sup> F NMR (377 MHz, CDCl <sub>3</sub> ) spectrum of <b>2</b> .....                                                                                                                              | 5 |
| Figure S7: <sup>31</sup> P{ <sup>1</sup> H} NMR (162 MHz, CDCl <sub>3</sub> ) spectrum of <b>2</b> . (Peak at -10.9 ppm corresponds to HP[(MeNCH <sub>2</sub> CH <sub>2</sub> ) <sub>3</sub> N] <sup>+</sup> ) ..... | 6 |
| Figure S8: <sup>11</sup> B NMR (128 MHz, CDCl <sub>3</sub> ) spectrum of <b>2</b> .....                                                                                                                              | 6 |
| [PhC(CF <sub>2</sub> )OP(MeNCH <sub>2</sub> CH <sub>2</sub> ) <sub>3</sub> N][O <sub>3</sub> SCF <sub>3</sub> ] <b>3</b> .....                                                                                       | 6 |
| Figure S9: <sup>19</sup> F{ <sup>1</sup> H} NMR (377 MHz, CDCl <sub>3</sub> ) spectrum of <b>3</b> .....                                                                                                             | 7 |
| Figure S10: <sup>31</sup> P{ <sup>1</sup> H} NMR (162 MHz, CDCl <sub>3</sub> ) spectrum of <b>3</b> .....                                                                                                            | 7 |
| [PhC(CF(H))OP(MeNCH <sub>2</sub> CH <sub>2</sub> ) <sub>3</sub> N][O <sub>3</sub> SCF <sub>3</sub> ] <b>3</b> .....                                                                                                  | 8 |
| Figure S11: <sup>1</sup> H NMR (400 MHz, CDCl <sub>3</sub> ) spectrum of <b>4</b> .....                                                                                                                              | 8 |
| Figure S12 <sup>13</sup> C NMR (100 MHz, CDCl <sub>3</sub> ) spectrum of <b>4</b> .....                                                                                                                              | 8 |
| Figure S13: <sup>19</sup> F NMR (377 MHz, CDCl <sub>3</sub> ) spectrum of <b>4</b> .....                                                                                                                             | 9 |
| Figure S14: <sup>31</sup> P NMR (162 MHz, CDCl <sub>3</sub> ) spectrum of <b>4</b> .....                                                                                                                             | 9 |

|                                                                                                                                                                                                |    |
|------------------------------------------------------------------------------------------------------------------------------------------------------------------------------------------------|----|
| [PhC(CH <sub>2</sub> )OP(MeNCH <sub>2</sub> CH <sub>2</sub> ) <sub>3</sub> N][O <sub>3</sub> SCF <sub>3</sub> ] 5 .....                                                                        | 10 |
| Figure S15: 1H NMR (500 MHz, CDCl <sub>3</sub> ) spectrum of 5.....                                                                                                                            | 10 |
| Figure S16: 13C NMR (500 MHz, CDCl <sub>3</sub> ) spectrum of 5.....                                                                                                                           | 10 |
| Figure S17: 19F NMR (377 MHz, CDCl <sub>3</sub> ) spectrum of 5.....                                                                                                                           | 11 |
| Figure S18: 31P{1H} NMR (162 MHz, CDCl <sub>3</sub> ) spectrum of 5.....                                                                                                                       | 11 |
| [HP(MeNCH <sub>2</sub> CH <sub>2</sub> ) <sub>3</sub> N][PhC(CH <sub>2</sub> )OB(C <sub>6</sub> F <sub>5</sub> ) <sub>3</sub> ] 6 .....                                                        | 12 |
| Figure S19: 1H NMR (500 MHz, CD <sub>2</sub> Cl <sub>2</sub> ) spectrum of 6 .....                                                                                                             | 12 |
| Figure S21: 19F NMR (377 MHz, CD <sub>2</sub> Cl <sub>2</sub> ) spectrum of 6.....                                                                                                             | 13 |
| Figure S22: 31P NMR (162 MHz, CDCl <sub>3</sub> ) spectrum of 6.....                                                                                                                           | 13 |
| Figure S23: 11B NMR (128 MHz, CD <sub>2</sub> Cl <sub>2</sub> ) spectrum of 6.....                                                                                                             | 14 |
| Computations .....                                                                                                                                                                             | 14 |
| Scheme S1: Proposed mechanism for DFEP[FB(C <sub>6</sub> H <sub>5</sub> ) <sub>3</sub> ] .....                                                                                                 | 16 |
| Figure S24: Thermodynamic and kinetic prediction using DFT for generation of DFEP[FBPh <sub>3</sub> ].<br>Energy's for stationary points, italicized, in kcal/mol.....                         | 16 |
| Figure S25: Approximated structures (SMD(DCM)/PBE0-GD3BJ/def2-TZVPP//SMD(DCM)/PBE0-<br>GD3BJ/def2-SVPP) used for calculation thermodynamic profile for DFEP[FBPh <sub>3</sub> ] formation..... | 17 |
| References.....                                                                                                                                                                                | 23 |

[PhC(O)CF<sub>2</sub>C(OSiMe<sub>2</sub>tBu)CF<sub>3</sub>Ph] **1**

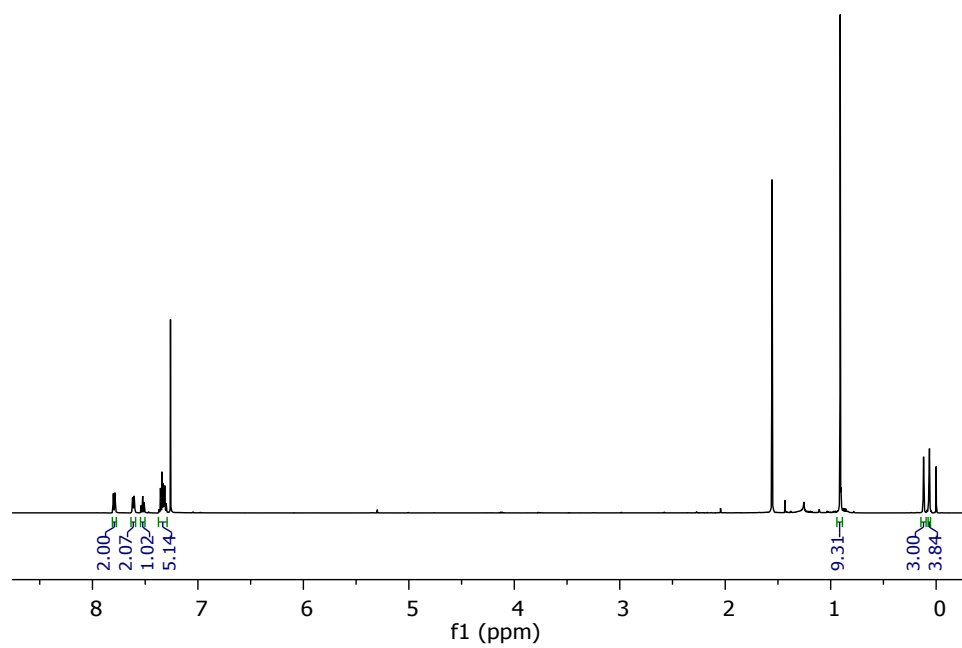

Figure S1: <sup>1</sup>H NMR (500 MHz, CDCl<sub>3</sub>) spectrum of **1**.

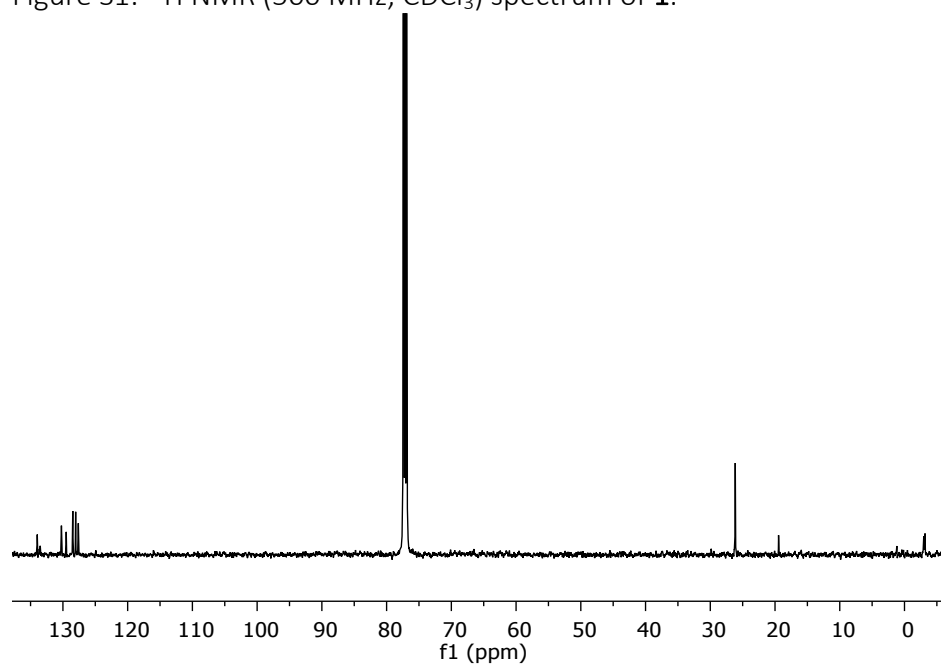

Figure S2: <sup>13</sup>C NMR (100 MHz, CDCl<sub>3</sub>) spectrum of **1**.

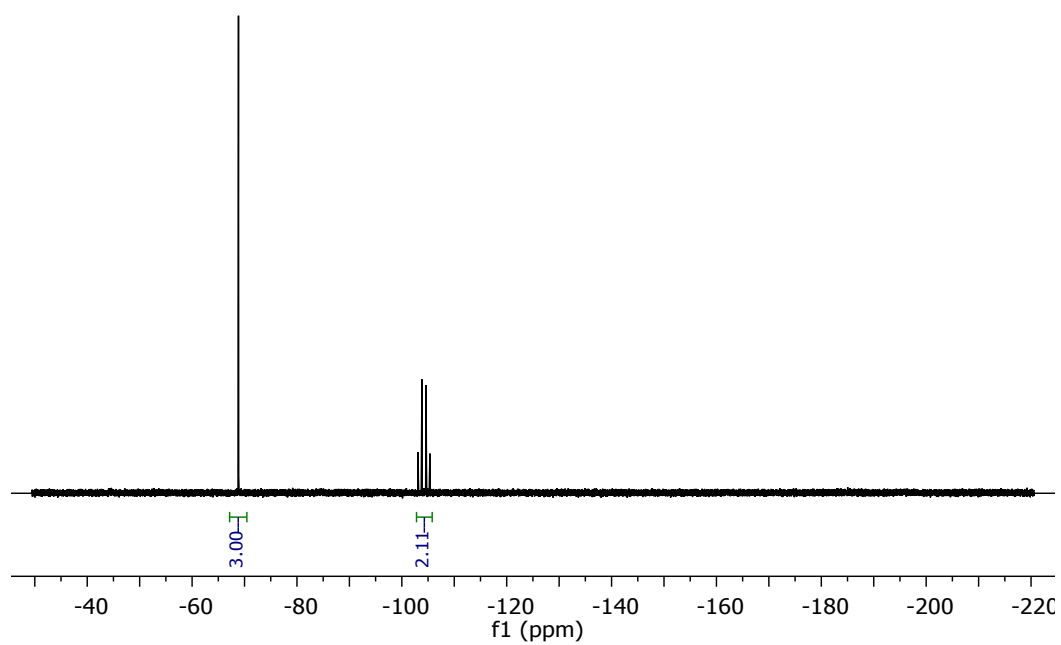

Figure S3:  $^{19}\text{F}\{\text{H}\}$  NMR (377 MHz,  $\text{CDCl}_3$ ) spectrum for 1.

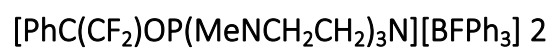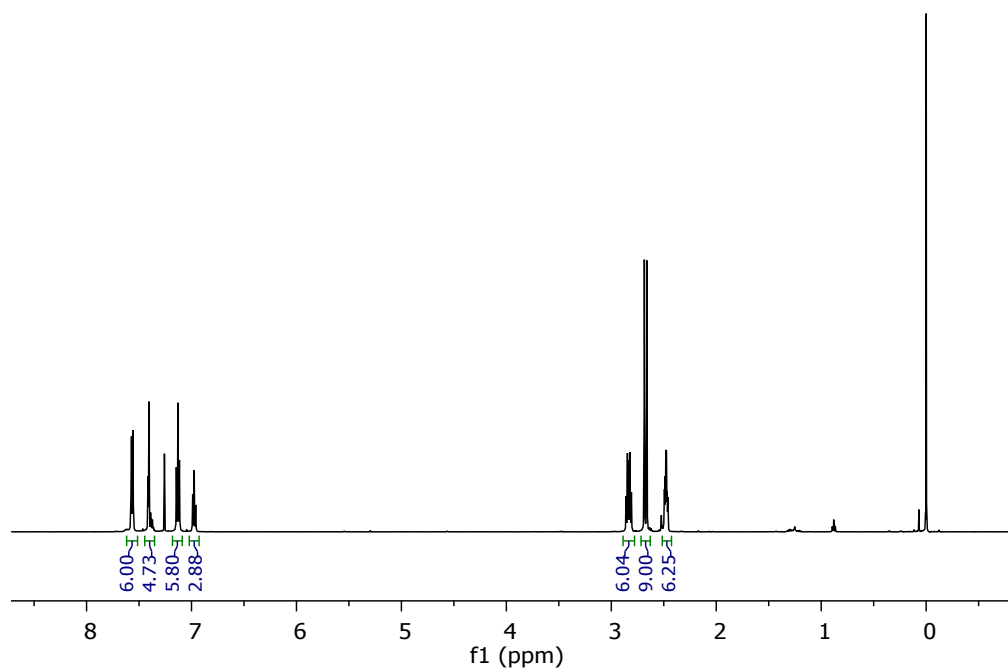

Figure S4:  $^1\text{H}$  NMR (500 MHz,  $\text{CDCl}_3$ ) spectrum of 2

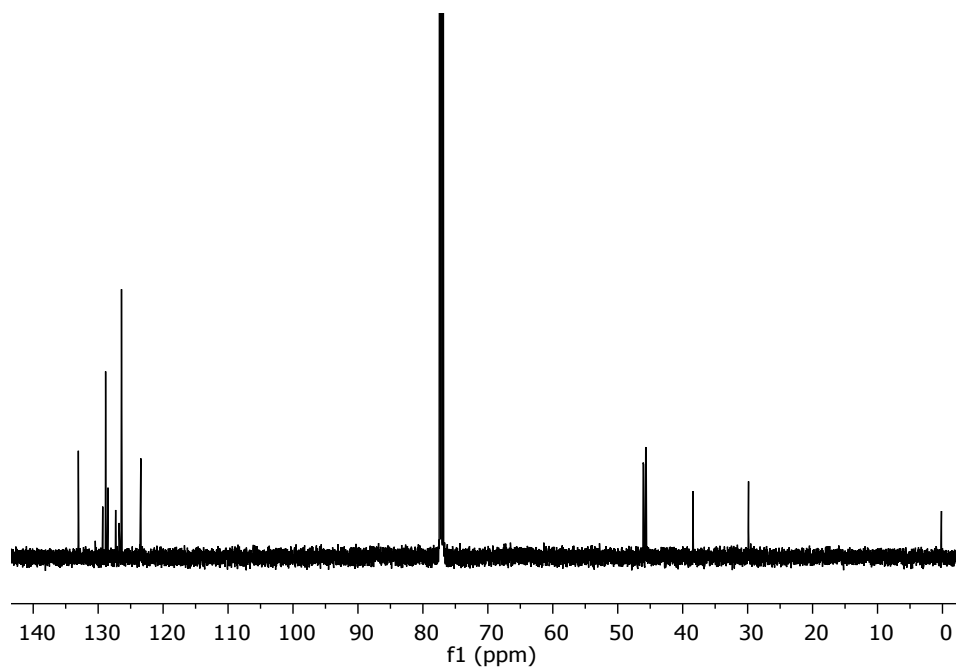

Figure S5 : <sup>13</sup>C NMR (100 MHz, CDCl<sub>3</sub>) spectrum of 2

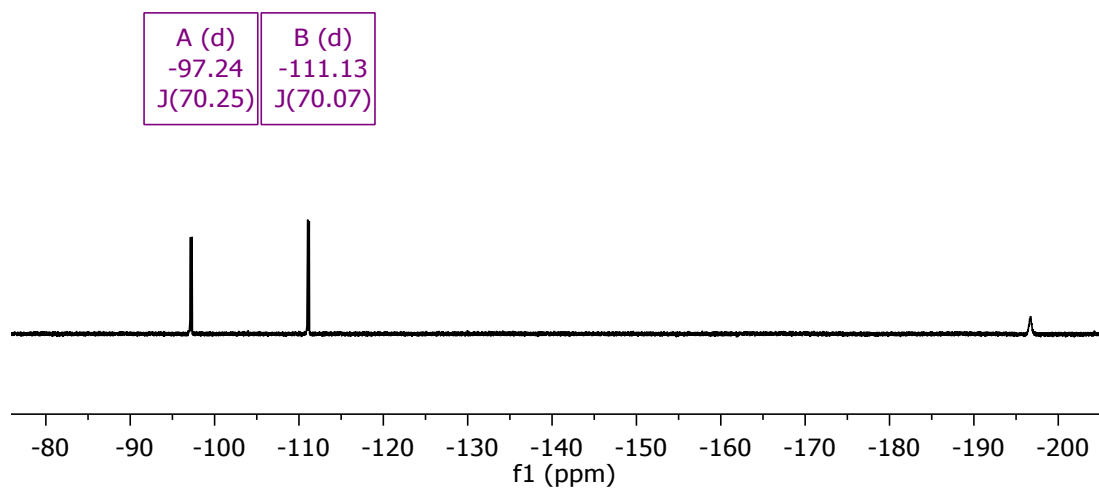

Figure S6: <sup>19</sup>F NMR (377 MHz, CDCl<sub>3</sub>) spectrum of 2.

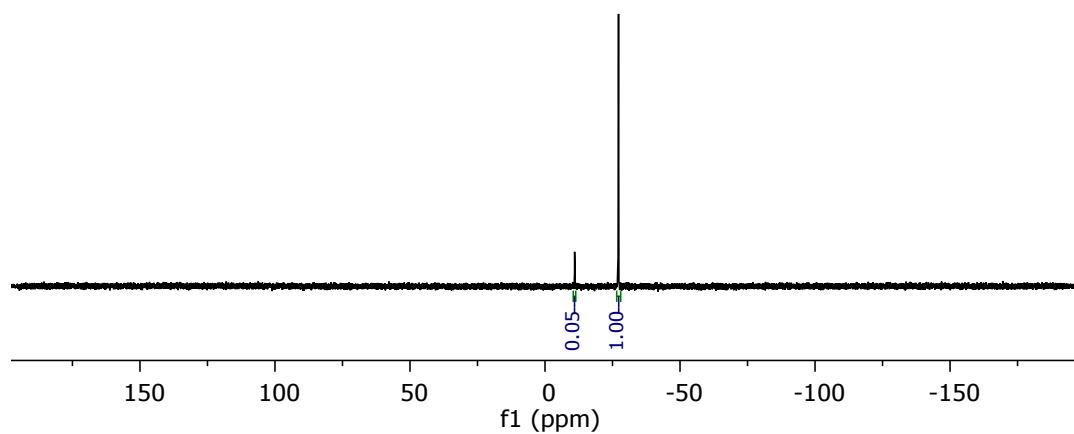

Figure S7:  $^{31}\text{P}\{^1\text{H}\}$  NMR (162 MHz,  $\text{CDCl}_3$ ) spectrum of 2. (Peak at -10.9 ppm corresponds to  $\text{HP}[(\text{MeNCH}_2\text{CH}_2)_3\text{N}]^+$ )

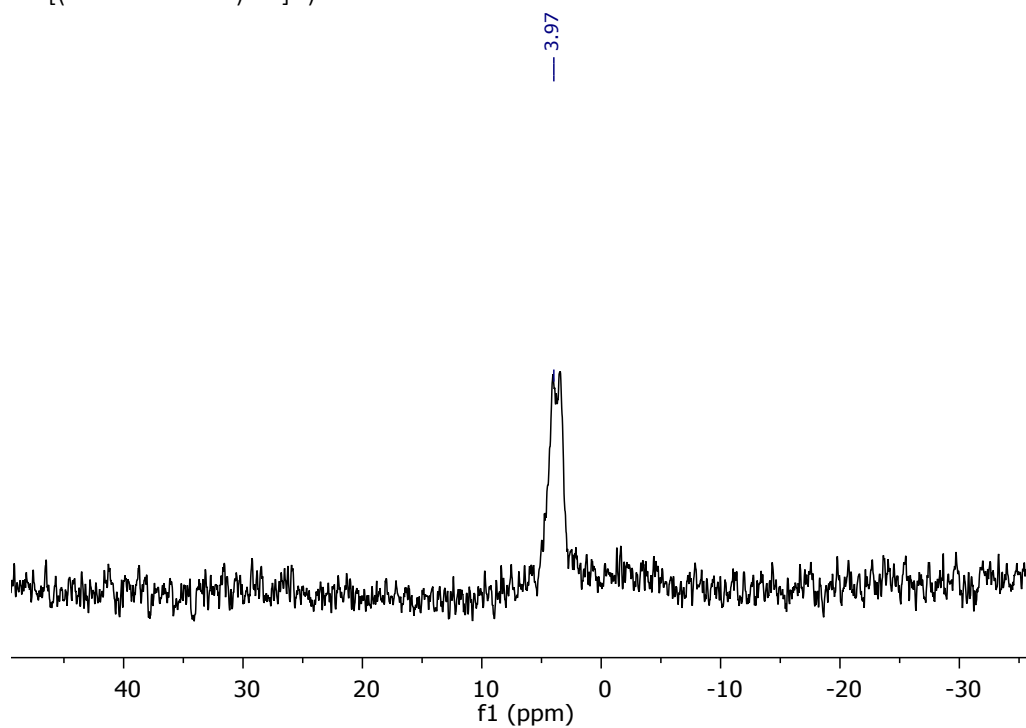

Figure S8:  $^{11}\text{B}$  NMR (128 MHz,  $\text{CDCl}_3$ ) spectrum of 2.  
 $[\text{PhC}(\text{CF}_2)\text{OP}(\text{MeNCH}_2\text{CH}_2)_3\text{N}][\text{O}_3\text{SCF}_3] \mathbf{3}$

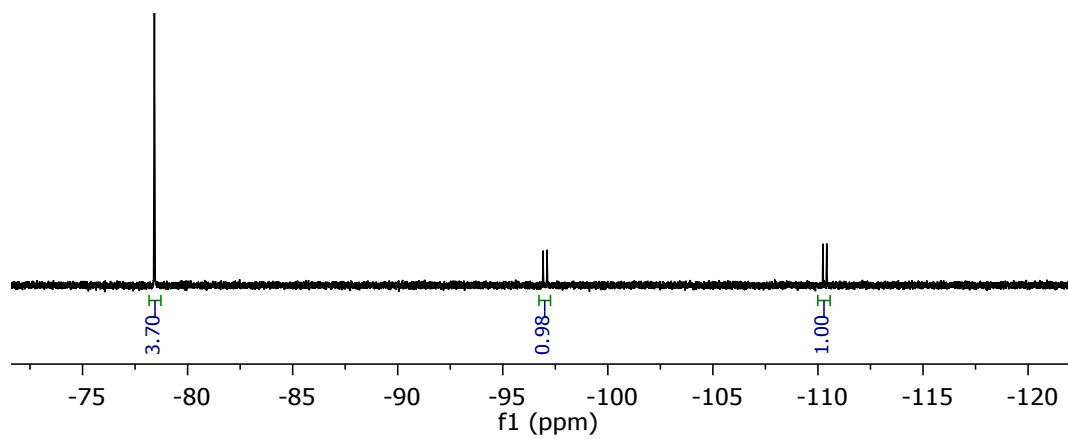

Figure S9:  $^{19}\text{F}\{^1\text{H}\}$  NMR (377 MHz,  $\text{CDCl}_3$ ) spectrum of 3.

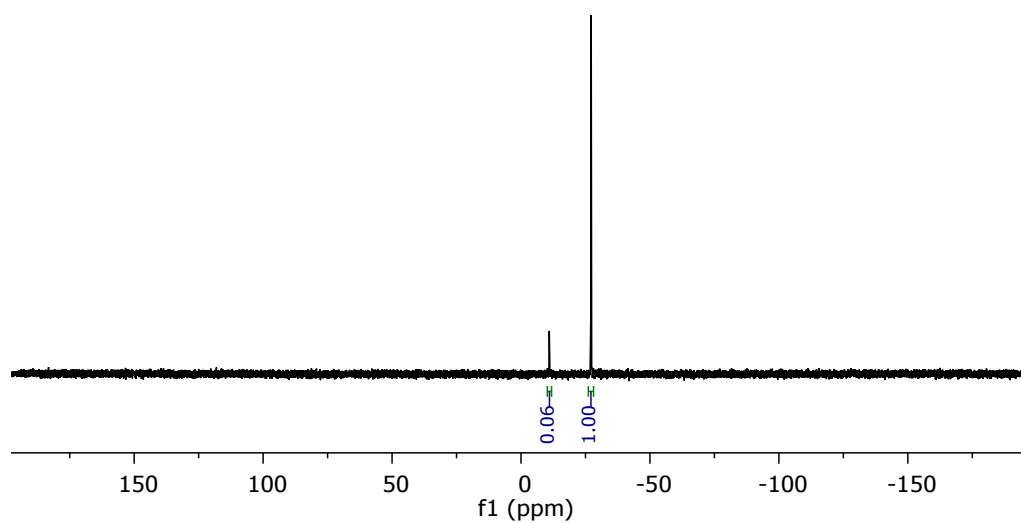

Figure S10:  $^{31}\text{P}\{^1\text{H}\}$  NMR (162 MHz,  $\text{CDCl}_3$ ) spectrum of 3

[PhC(CF(H))OP(MeNCH<sub>2</sub>CH<sub>2</sub>)<sub>3</sub>N][O<sub>3</sub>SCF<sub>3</sub>] 3

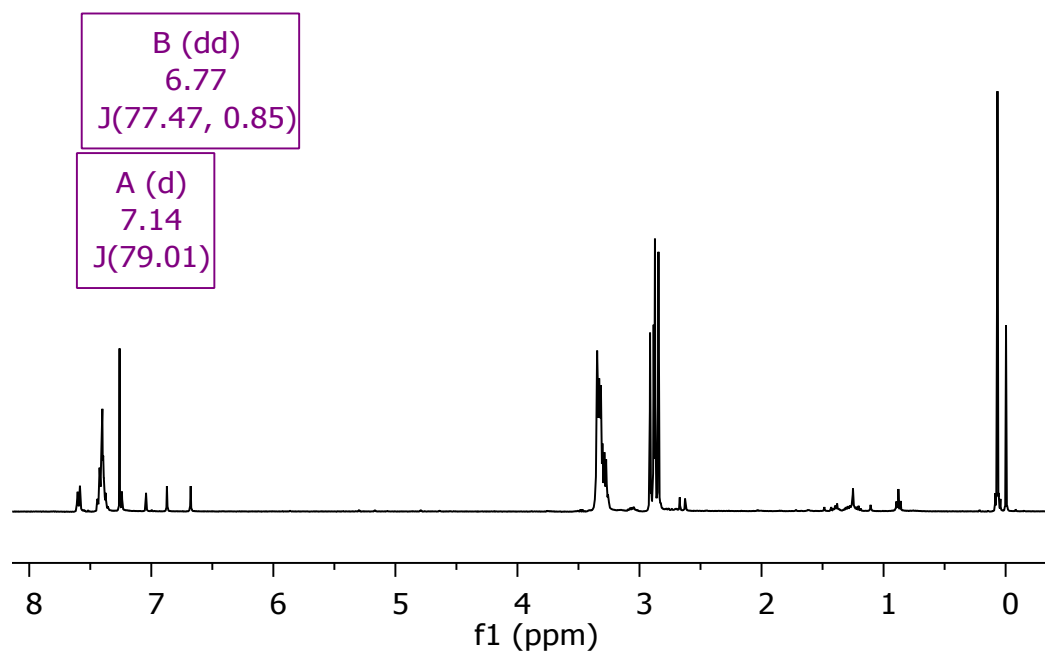

Figure S11: <sup>1</sup>H NMR (400 MHz, CDCl<sub>3</sub>) spectrum of 4.

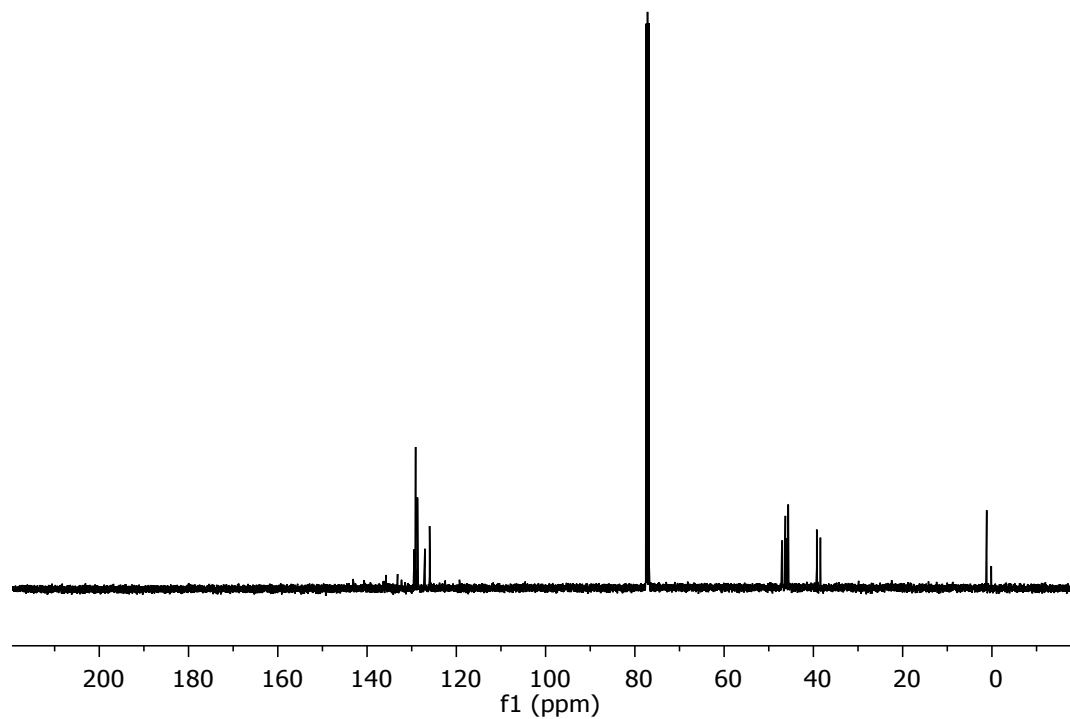

Figure S12 <sup>13</sup>C NMR (100 MHz, CDCl<sub>3</sub>) spectrum of 4.



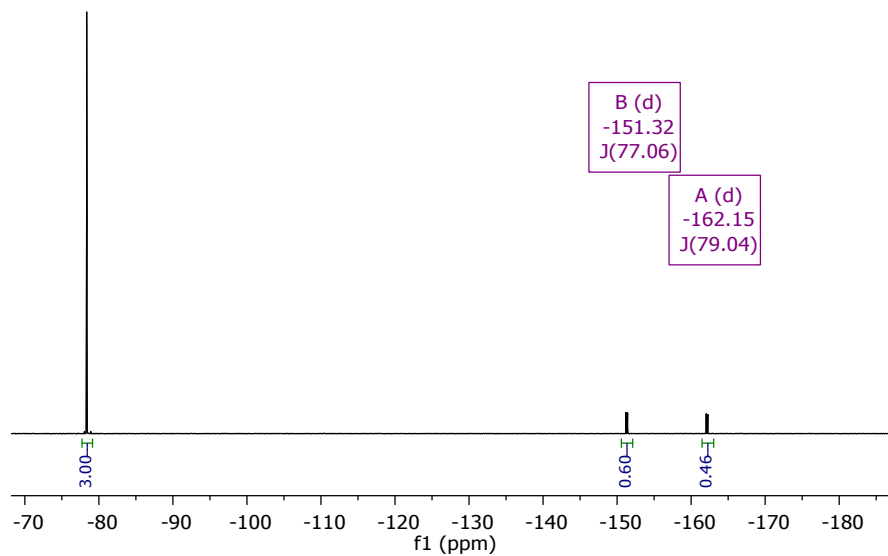

Figure S13: 19F NMR (377 MHz, CDCl3) spectrum of 4.

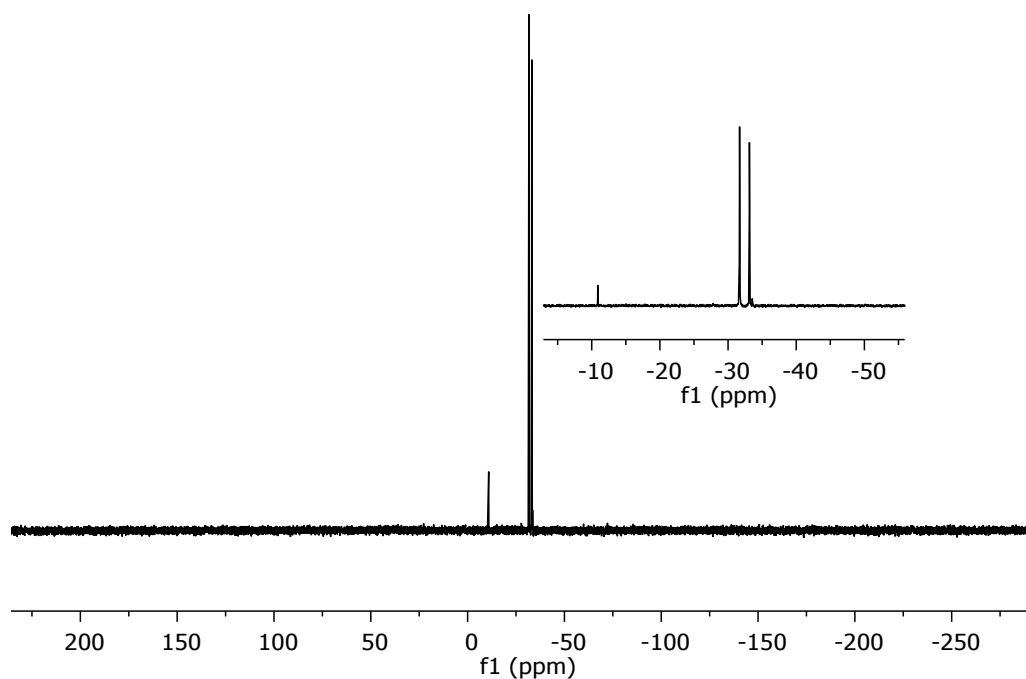

Figure S14: 31P NMR (162 MHz, CDCl3) spectrum of 4.

[PhC(CH<sub>2</sub>)OP(MeNCH<sub>2</sub>CH<sub>2</sub>)<sub>3</sub>N][O<sub>3</sub>SCF<sub>3</sub>] 5

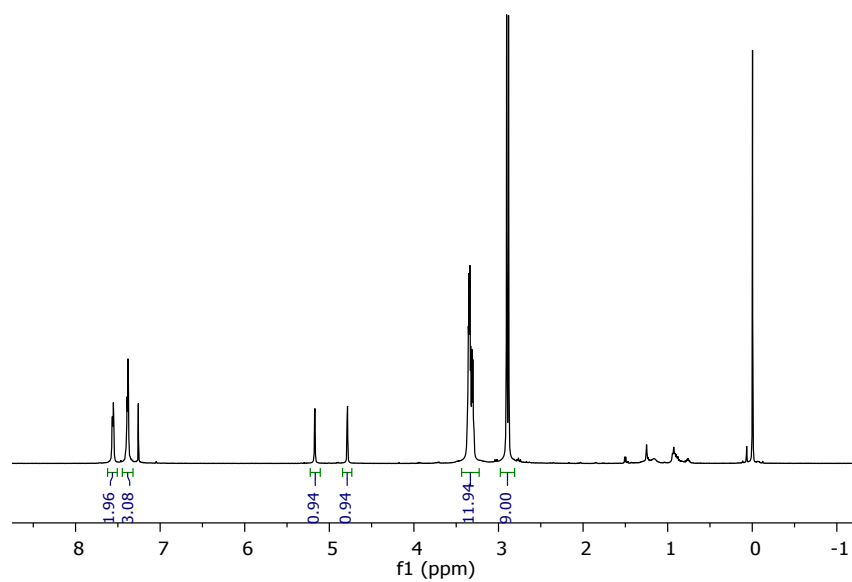

Figure S15: <sup>1</sup>H NMR (500 MHz, CDCl<sub>3</sub>) spectrum of 5.

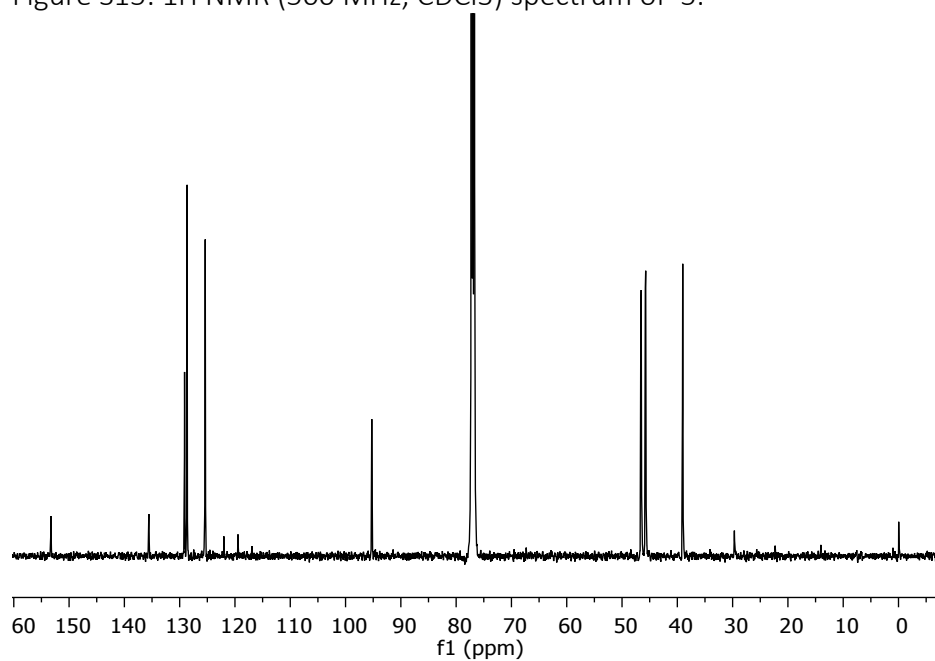

Figure S16: <sup>13</sup>C NMR (500 MHz, CDCl<sub>3</sub>) spectrum of 5.

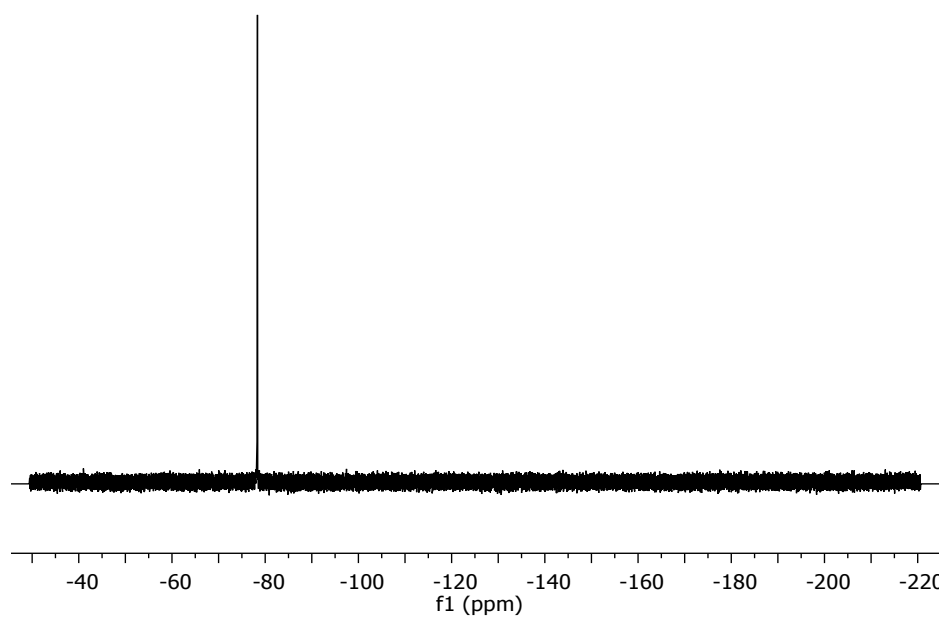

Figure S17:  $^{19}\text{F}$  NMR (377 MHz,  $\text{CDCl}_3$ ) spectrum of 5.

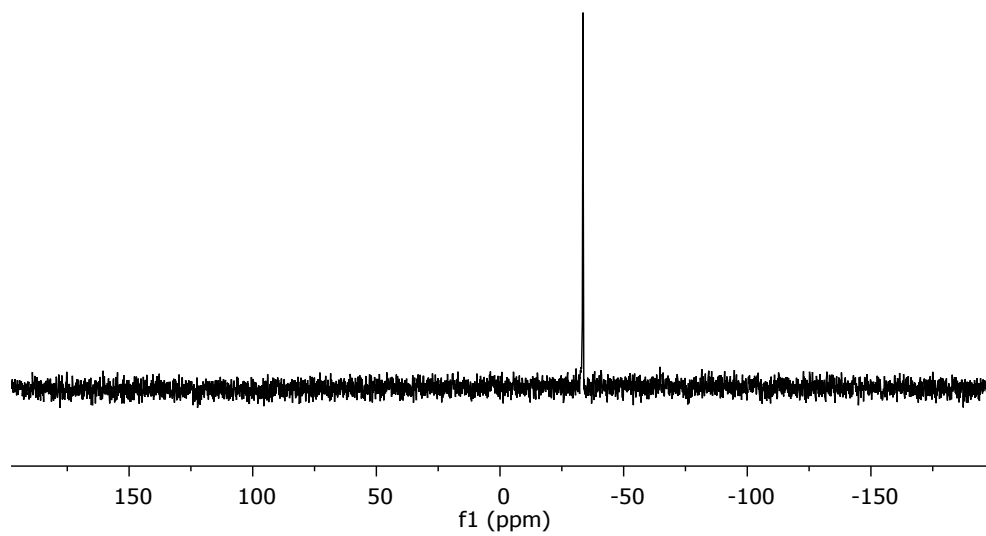

Figure S18:  $^{31}\text{P}\{^1\text{H}\}$  NMR (162 MHz,  $\text{CDCl}_3$ ) spectrum of 5.

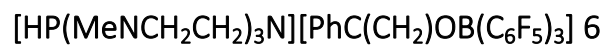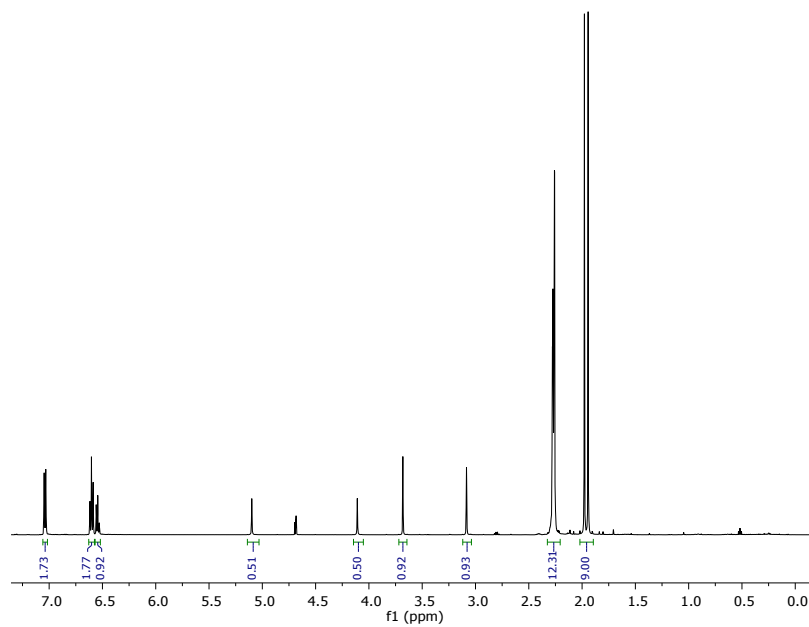

Figure S19: <sup>1</sup>H NMR (500 MHz, CD<sub>2</sub>Cl<sub>2</sub>) spectrum of 6

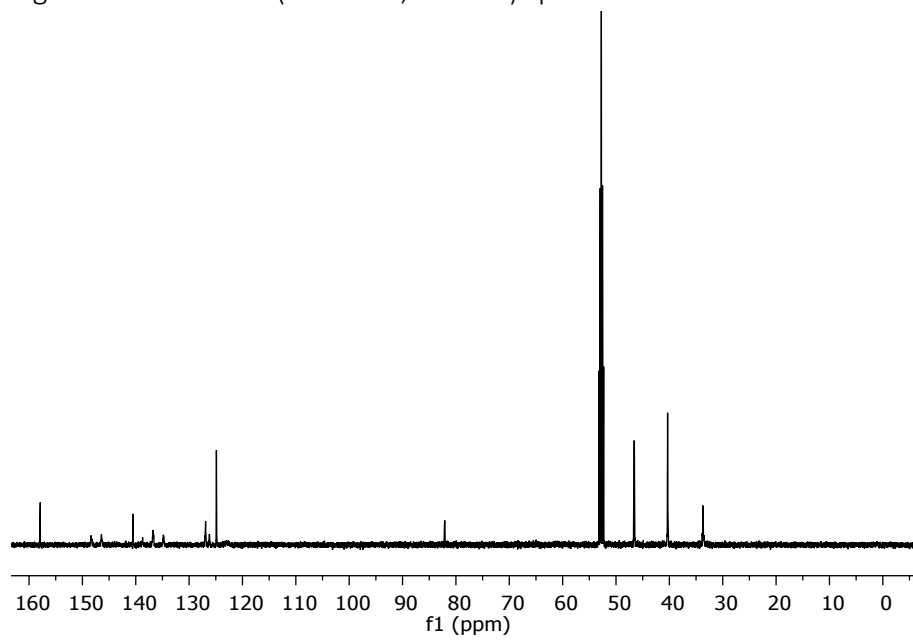

Figure S20: <sup>13</sup>C NMR (100 MHz, CD<sub>2</sub>Cl<sub>2</sub>) spectrum of 6

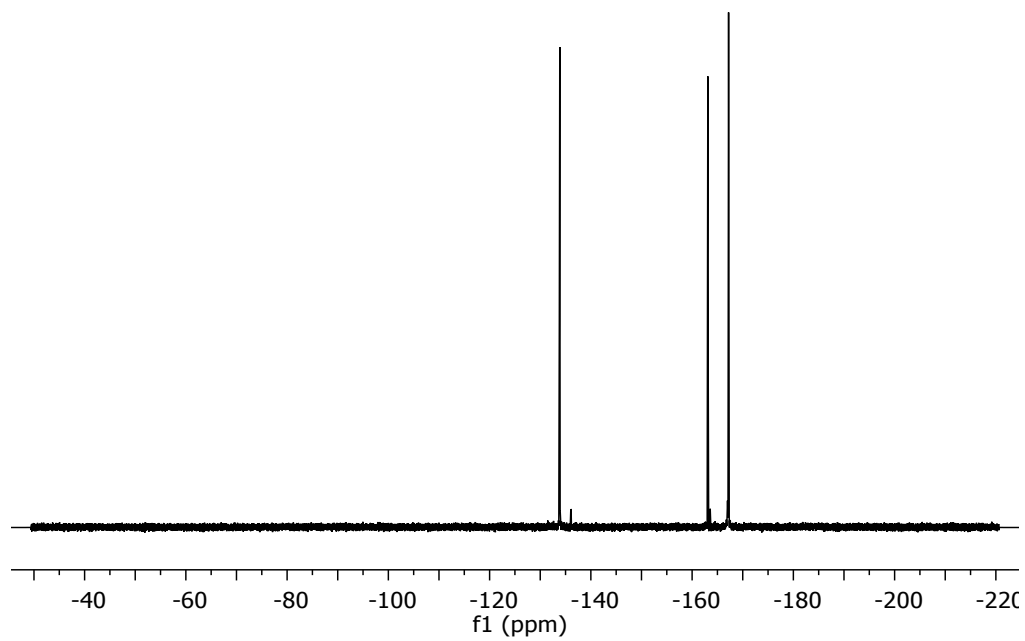

Figure S21:  $^{19}\text{F}$  NMR (377 MHz,  $\text{CD}_2\text{Cl}_2$ ) spectrum of 6.

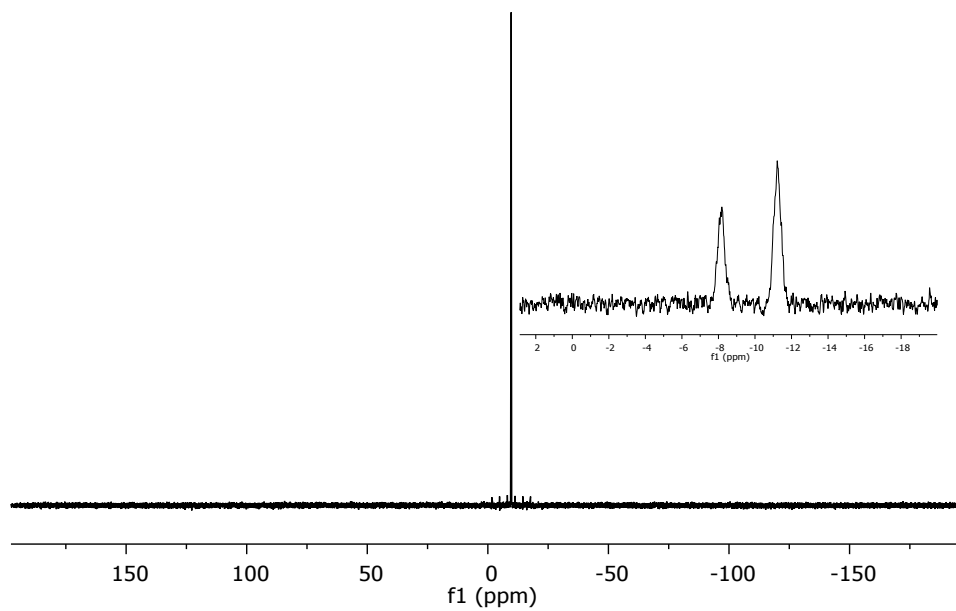

Figure S22:  $^{31}\text{P}$  NMR (162 MHz,  $\text{CDCl}_3$ ) spectrum of 6.

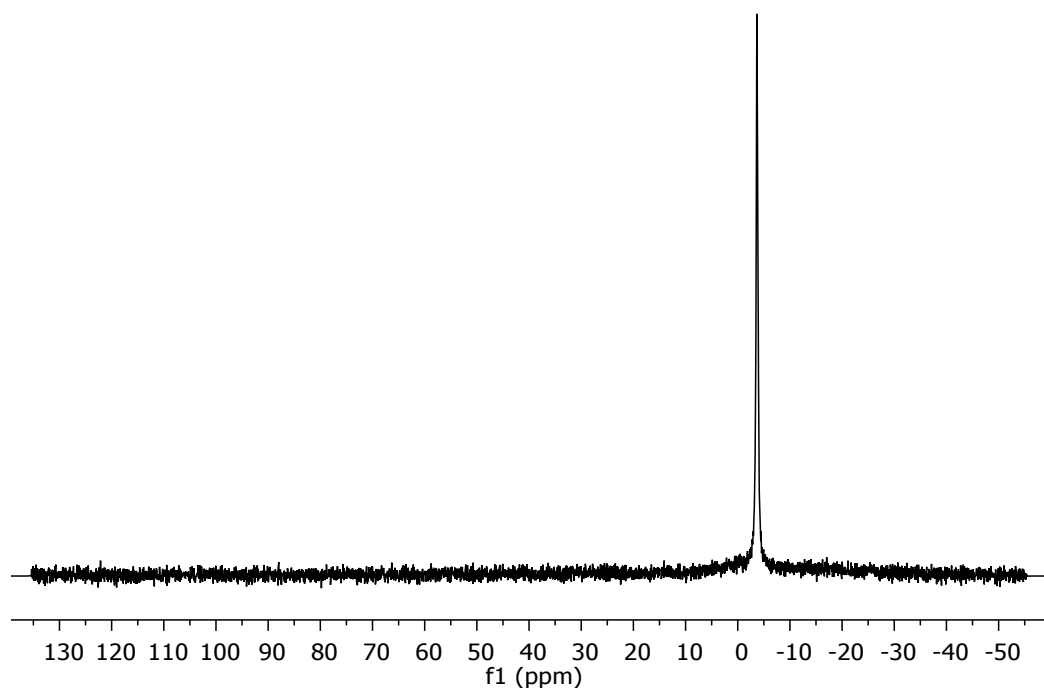

Figure S23:  $^{11}\text{B}$  NMR (128 MHz,  $\text{CD}_2\text{Cl}_2$ ) spectrum of 6.

## Computations

Calculations were carried out with the Gaussian 09 package,<sup>7</sup> All geometry optimizations were performed with the PBE1PBE functional. The optimizations also implemented Grimme's D3 empirical dispersion with Beck-Johnson damping (GD3BJ)<sup>8</sup> alongside SMD solvent correction. Def2-SVPP basis set was used for all the atoms. Frequency calculations at the same level of theory, with the same corrections, were performed to identify the number of imaginary frequencies and provide the thermal corrections of Gibbs free energy. Intrinsic Reaction Coordinates (IRC) were performed for transition state structures to determine corresponding two minima.

Single-point energy calculations were performed at the PBE1PBE/Def2-TZVPP level of theory alongside the SMD solvent correction and Grimme's GD3BJ. The Gibbs energy corrections from frequency calculations were added to the single-point energies to obtain the Gibbs free energies in solution. All the solution-phase free energies reported in the paper correspond to the reference state of 1 mol/L, 298K.

All geometry optimization and frequency calculations were performed using Gaussian 09. The PBE0 functional with def2-SVPP basis set was used. Stefan Grimme's D3 dispersion with added Becke-Johnson damping function for the empirical dispersion correction was implemented alongside the SMD model for solvent correction. The single-point energy calculations were performed with the same functional, empirical dispersion correction, and solvent corrections as

the geometry and frequency calculations, but the basis set used was def2-TZVPP. Minimum stationary states were identified by the absence of imaginary frequencies, whilst the transition states resulted in a single imaginary frequency.

| Compound | Single point energy (Hartree) | Thermal correction to Gibbs Free Energy (Hartree) | Sum of Electronic and Thermal Enthalpy (Hartree) |
|----------|-------------------------------|---------------------------------------------------|--------------------------------------------------|
| 1        | -682.194021429                | 0.079532                                          | -682.1144894                                     |
| 2        | -915.410104705                | 0.272955                                          | -915.1371497                                     |
| 3        | -719.260113261                | 0.235419                                          | -719.0246943                                     |
| TS1      | -1597.61033494                | 0.380213                                          | -1597.230122                                     |
| 4        | -1597.61298337                | 0.381474                                          | -1597.231509                                     |
| 5        | -1597.62420599                | 0.379641                                          | -1597.244565                                     |
| TS2      | -2316.88643402                | 0.635210                                          | -2316.251224                                     |
| 6        | -1497.69719234                | 0.382257                                          | -1497.314935                                     |
| 7        | -819.229559691                | 0.233689                                          | -818.9958707                                     |

Table S 1: Thermodynamic intermediates and transition state calculation energies

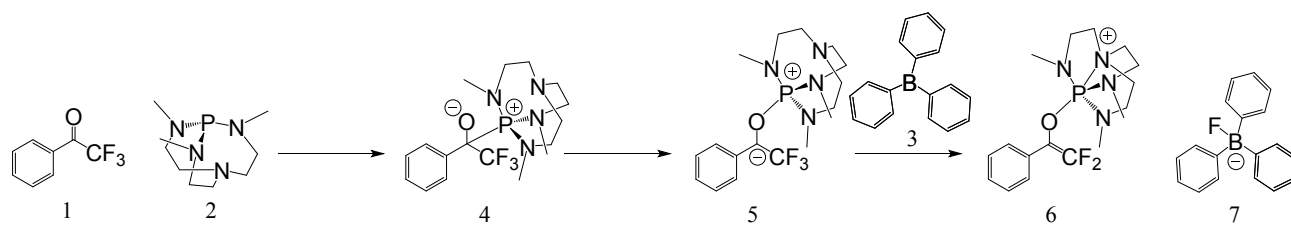

Scheme S1: Proposed mechanism for DFEP[FB(C<sub>6</sub>H<sub>5</sub>)<sub>3</sub>]

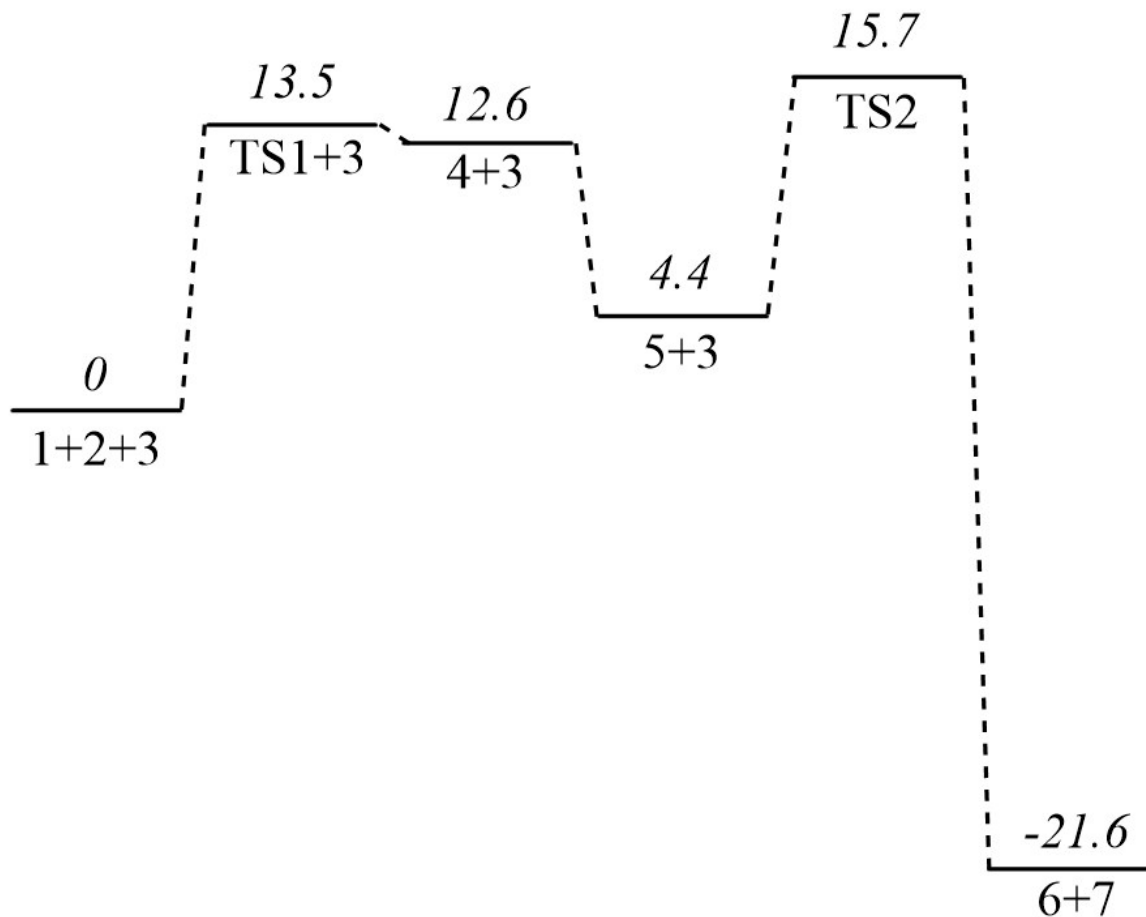

Figure S24: Thermodynamic and kinetic prediction using DFT for generation of DFEP[FBPh<sub>3</sub>]. Energy's for stationary points, italicized, in kcal/mol.

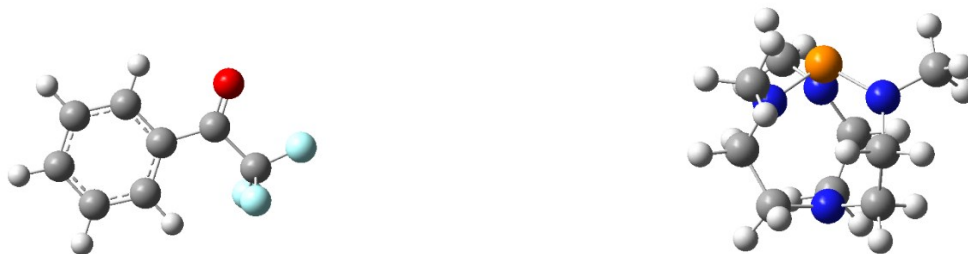



1

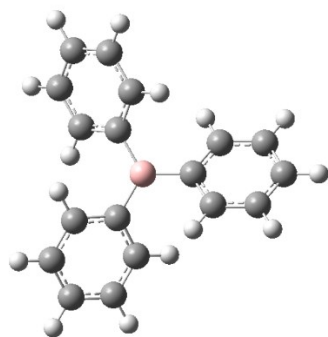

2

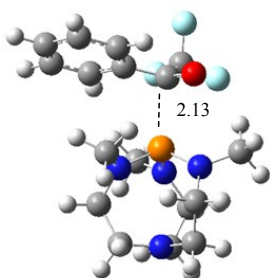

4

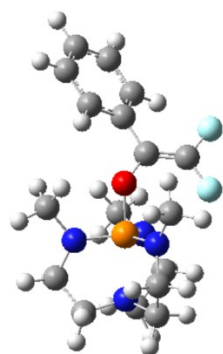

5

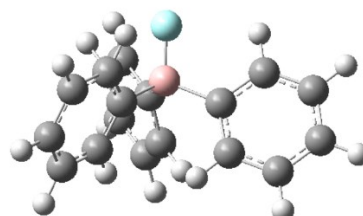

3

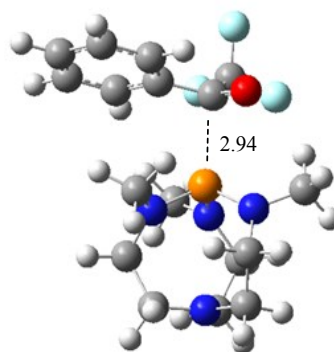

TS1

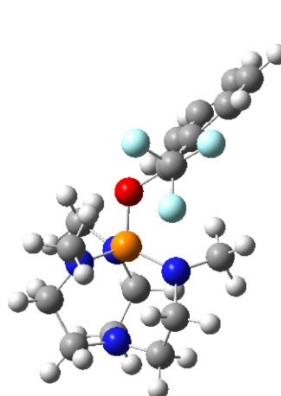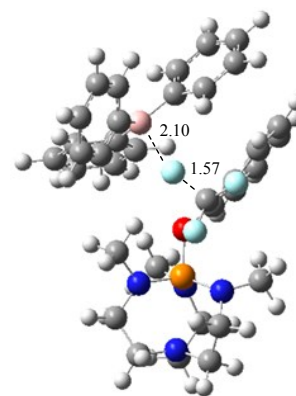

TS2

Figure S25: Approximated structures (SMD(DCM)/PBE0-GD3BJ/def2-TZVPP//SMD(DCM)/PBE0-GD3BJ/def2-SVPP) used for calculation thermodynamic profile for DFEP[FBPH<sub>3</sub>] formation. The computational approximations' coordinates for all the atoms are listed in the X, Y, Z Cartesian. The elemental symbols (i.e. P, N, O, C, B, F, H) are all for ground state electronic configurations. Therefore, the elemental symbols P, N, O, C, B, F, and H correspond to 15, 9, 8, 7, 6, 5, and 1 atomic numbers, respectively, in the singlet electronic configuration.

Optimized (SMD(DCM)/PBE0-GD3BJ/def2-TZVPP//SMD(DCM)/PBE0-GD3BJ/def2-svpp) Cartesian coordinates for **1**

|   |             |             |            |   |             |             |            |
|---|-------------|-------------|------------|---|-------------|-------------|------------|
| C | -4.22270200 | 0.06235800  | 1.49168600 | H | -4.66903700 | 3.44600900  | 1.50427300 |
| C | -2.83106200 | 0.01396100  | 1.48988400 | H | -5.97694700 | 1.32271000  | 1.49894300 |
| C | -2.09001200 | 1.20702900  | 1.49262500 | C | -0.61238200 | 1.25552400  | 1.49055100 |
| C | -2.76325200 | 2.43981700  | 1.49717900 | O | 0.02904300  | 2.27755400  | 1.47940800 |
| C | -4.15136900 | 2.48246500  | 1.49985000 | C | 0.17470700  | -0.07883900 | 1.50552600 |
| C | -4.88308600 | 1.29160700  | 1.49698700 | F | 1.47721500  | 0.15053700  | 1.51330700 |
| H | -4.79613500 | -0.86890500 | 1.48899300 | F | -0.12579500 | -0.80059200 | 2.58839100 |
| H | -2.33859100 | -0.96023200 | 1.48547800 | F | -0.11019300 | -0.81557500 | 0.42839800 |
| H | -2.17303100 | 3.35977600  | 1.49922900 |   |             |             |            |

Optimized (SMD(DCM)/PBE0-GD3BJ/def2-TZVPP//SMD(DCM)/PBE0-GD3BJ/def2-svpp) Cartesian coordinates for **2**

|   |             |             |            |   |             |             |            |
|---|-------------|-------------|------------|---|-------------|-------------|------------|
| P | 2.93932600  | 1.30957700  | 5.88622200 | H | 0.54844300  | -1.00342000 | 5.23424000 |
| N | 2.64177000  | 1.43144000  | 2.51661700 | H | 2.49254400  | -0.90517300 | 4.00593200 |
| N | 1.37344000  | 0.97237100  | 5.26380300 | H | 4.17026200  | -1.39054900 | 3.72176600 |
| N | 3.30830700  | 2.82309800  | 5.15959200 | H | -0.32712100 | 1.55010700  | 4.22662000 |
| N | 3.93670300  | 0.22014400  | 5.00716800 | H | 0.96286200  | 2.76171100  | 4.27263800 |
| C | 4.02982900  | 2.97557200  | 3.91805700 | H | 2.48719100  | 3.74411600  | 6.84109400 |
| C | 0.63156300  | -0.09901100 | 5.87366200 | H | 2.01398700  | 4.52224500  | 5.30926000 |
| C | 3.51067000  | -0.50966500 | 3.83640300 | H | 3.66890100  | 4.74883600  | 5.95406900 |
| C | 0.76967100  | 1.67940300  | 4.15893700 | H | 0.97674400  | 0.20854100  | 2.57830200 |
| C | 2.85058300  | 4.01051300  | 5.83081500 | H | 0.64367500  | 1.86098600  | 2.02842500 |
| C | 1.23477200  | 1.26680500  | 2.76040800 | H | 4.51980600  | 0.60540200  | 2.27316900 |
| C | 3.49568200  | 0.27552900  | 2.52242400 | H | 3.19335400  | -0.43261400 | 1.71915600 |
| C | 3.22642400  | 2.73909200  | 2.63666200 | H | 2.41423500  | 3.48405200  | 2.56295500 |
| C | 5.28939600  | 0.04232000  | 5.46397600 | H | 3.90840200  | 2.93748700  | 1.78016500 |
| H | 4.45415000  | 3.99706800  | 3.89157000 | H | 5.40713300  | 0.51562800  | 6.45685000 |
| H | 4.89152400  | 2.28296900  | 3.91122600 | H | 5.54350600  | -1.03163500 | 5.57344000 |
| H | 1.13568800  | -0.40840800 | 6.80845800 | H | 6.04852500  | 0.49931500  | 4.79432700 |
| H | -0.39734900 | 0.21894400  | 6.13829400 |   |             |             |            |

Optimized (SMD(DCM)/PBE0-GD3BJ/def2-TZVPP//SMD(DCM)/PBE0-GD3BJ/def2-svpp) Cartesian coordinates for **3**

|   |             |             |             |   |             |             |             |
|---|-------------|-------------|-------------|---|-------------|-------------|-------------|
| B | -0.49401600 | 0.22117600  | 0.00302600  | C | 3.89936300  | 0.22027700  | -0.00370100 |
| C | 1.07302200  | 0.22096300  | 0.00080300  | H | 3.74622000  | -1.36872400 | 1.45604900  |
| C | 1.80642000  | -0.67811300 | 0.80061300  | H | 3.74233400  | 1.80937600  | -1.46294100 |
| C | 1.80430100  | 1.11973100  | -0.80128700 | H | 4.99418600  | 0.21999200  | -0.00546500 |
| C | 3.20033600  | -0.67127600 | 0.81269300  | C | -1.27720900 | 1.56596900  | -0.17964800 |
| H | 1.27128000  | -1.38869900 | 1.43888300  | C | -2.51589300 | 1.60697600  | -0.85054600 |
| C | 3.19817200  | 1.11219800  | -0.81783700 | C | -0.77037900 | 2.78219800  | 0.32023100  |
| H | 1.26745400  | 1.83056800  | -1.43784200 | C | -3.20824700 | 2.80377200  | -1.02809800 |

|   |             |             |             |   |             |             |             |
|---|-------------|-------------|-------------|---|-------------|-------------|-------------|
| H | -2.93815500 | 0.68159000  | -1.25542400 | C | -2.51419700 | -1.16411500 | 0.86153700  |
| C | -1.47043800 | 3.97853100  | 0.17201100  | C | -1.47150200 | -3.53601800 | -0.16305200 |
| H | 0.18748400  | 2.78671700  | 0.85034300  | H | 0.18501600  | -2.34458100 | -0.84544800 |
| C | -2.68905300 | 3.99194400  | -0.50977300 | C | -3.20635800 | -2.36076100 | 1.04084400  |
| H | -4.16055900 | 2.81131100  | -1.56781600 | H | -2.93536900 | -0.23859400 | 1.26724700  |
| H | -1.06254800 | 4.90702600  | 0.58405900  | C | -2.68855200 | -3.54910800 | 0.52152600  |
| H | -3.23584500 | 4.93173700  | -0.63793800 | H | -1.06472400 | -4.46464800 | -0.57589300 |
| C | -1.27704500 | -1.12343000 | 0.18778900  | H | -4.15743400 | -2.36805000 | 1.58274000  |
| C | -0.77159700 | -2.33982600 | -0.31308900 | H | -3.23521100 | -4.48878500 | 0.65110300  |

Optimized (SMD(DCM)/PBE0-GD3BJ/def2-TZVPP//SMD(DCM)/PBE0-GD3BJ/def2-svpp) Cartesian coordinates for **TS1**

|   |             |             |             |   |             |             |             |
|---|-------------|-------------|-------------|---|-------------|-------------|-------------|
| P | -0.13318700 | -0.37481800 | 0.10527800  | H | 2.13290300  | 0.01646300  | 3.25140000  |
| N | 0.06959800  | -0.05112600 | 3.30176800  | H | 1.37933800  | 1.52052900  | 3.80829900  |
| N | 1.31294700  | 0.34512200  | 0.58452600  | H | -0.87584000 | -1.85516900 | 3.65136900  |
| N | -1.34929900 | 0.61004300  | 0.74599000  | H | 0.81071600  | -1.81025400 | 4.19650600  |
| N | -0.24920000 | -1.84237200 | 0.94345300  | H | -1.01443600 | 1.70454200  | 3.30570300  |
| C | -2.02441500 | 0.30862200  | 1.99311100  | H | -1.82323100 | 0.36095500  | 4.13063700  |
| C | 2.57617900  | -0.10248300 | 0.03936400  | H | -2.06389000 | -2.31485900 | -0.01348500 |
| C | 0.58961000  | -2.15186400 | 2.08526800  | H | -0.98695900 | -3.71380900 | 0.26674300  |
| C | 1.38397500  | 1.30052400  | 1.67600100  | H | -1.89573700 | -2.97661300 | 1.62304200  |
| C | -1.55304900 | 1.93082800  | 0.18976300  | C | -3.79450600 | 0.39284600  | -2.58061600 |
| C | 1.27743000  | 0.69120500  | 3.07486200  | C | -2.58756700 | -0.22631600 | -2.25988500 |
| C | 0.12831200  | -1.48338900 | 3.38200800  | C | -1.36851600 | 0.37760400  | -2.59445200 |
| C | -1.19959000 | 0.61756300  | 3.24708600  | C | -1.38901600 | 1.60621200  | -3.26487600 |
| C | -1.34217800 | -2.75493300 | 0.69083600  | C | -2.59384500 | 2.22636600  | -3.58801900 |
| H | -2.96875600 | 0.88238600  | 2.01543300  | C | -3.80367500 | 1.62280800  | -3.24175300 |
| H | -2.31166800 | -0.75525200 | 2.00894300  | H | -4.73787200 | -0.08879300 | -2.30490600 |
| H | 2.40527700  | -0.78040300 | -0.80649600 | H | -2.60770000 | -1.18097000 | -1.73210500 |
| H | 3.16108600  | 0.75579600  | -0.33895400 | H | -0.42965000 | 2.06674800  | -3.51468100 |
| H | 3.18904900  | -0.63362800 | 0.79529500  | H | -2.58924400 | 3.18777800  | -4.11152000 |
| H | 1.62764700  | -1.84806400 | 1.87308200  | H | -4.75339300 | 2.10840400  | -3.48734200 |
| H | 0.60769700  | -3.25003800 | 2.20904800  | C | 0.00829500  | -0.17811900 | -2.27683900 |
| H | 2.34162500  | 1.84276700  | 1.58089600  | O | 1.01085900  | 0.52861400  | -2.47524000 |
| H | 0.59199900  | 2.05810900  | 1.56065700  | C | 0.19381300  | -1.66638000 | -2.64925500 |
| H | -0.79929500 | 2.13765000  | -0.58600300 | F | 1.35184100  | -2.15312200 | -2.19629500 |
| H | -1.44588300 | 2.71033700  | 0.96825600  | F | -0.76595500 | -2.49720600 | -2.22382700 |
| H | -2.55520600 | 2.03599100  | -0.26828600 | F | 0.22385900  | -1.77145300 | -3.98693700 |

Optimized (SMD(DCM)/PBE0-GD3BJ/def2-TZVPP//SMD(DCM)/PBE0-GD3BJ/def2-svpp) Cartesian coordinates for **4**

|     |             |             |             |   |             |             |             |
|-----|-------------|-------------|-------------|---|-------------|-------------|-------------|
| O 1 |             |             |             | C | 0.15000800  | -1.32787200 | 2.87501000  |
| P   | -0.14309500 | -0.78338100 | -0.48696100 | C | -0.96384800 | 0.85091500  | 2.40511400  |
| N   | 0.22883800  | 0.06072100  | 2.52020400  | C | -1.58048800 | -2.88034800 | 0.55377800  |
| N   | 1.38952700  | -0.17895400 | -0.21114000 | H | -2.74688700 | 1.10651500  | 1.18573900  |
| N   | -1.22263300 | 0.42126400  | -0.04448300 | H | -2.28471000 | -0.57363800 | 1.46271000  |
| N   | -0.37180500 | -2.08153600 | 0.55935100  | H | 2.31377300  | -1.70955500 | -1.31559200 |
| C   | -1.87770400 | 0.42804100  | 1.25096900  | H | 3.19039100  | -0.16862100 | -1.30253900 |
| C   | 2.58012200  | -0.85252600 | -0.68674400 | H | 3.19907600  | -1.21396400 | 0.15827600  |
| C   | 0.48920100  | -2.26877700 | 1.71722400  | H | 1.54047300  | -2.12334200 | 1.42237300  |
| C   | 1.61157500  | 0.95709100  | 0.66876700  | H | 0.39868500  | -3.32173300 | 2.03852800  |
| C   | -1.29233400 | 1.63747200  | -0.83123500 | H | 2.61727100  | 1.35495500  | 0.44695000  |
| C   | 1.49744600  | 0.62547300  | 2.15681200  | H | 0.90349300  | 1.76518600  | 0.42660400  |

|   |             |             |             |   |             |             |             |
|---|-------------|-------------|-------------|---|-------------|-------------|-------------|
| H | -0.55324500 | 1.60286700  | -1.64691300 | C | -1.45621300 | 0.48433200  | -4.07950400 |
| H | -1.06280900 | 2.52325900  | -0.20902400 | C | -2.61313200 | 1.07221700  | -4.58750300 |
| H | -2.29477900 | 1.77466600  | -1.27730100 | C | -3.86247300 | 0.69362200  | -4.09358300 |
| H | 2.28597800  | -0.09431700 | 2.43663700  | H | -4.91407500 | -0.59079300 | -2.70614600 |
| H | 1.70439700  | 1.55473700  | 2.72987900  | H | -2.87150500 | -1.63411900 | -1.82281700 |
| H | -0.87502600 | -1.53613500 | 3.22838600  | H | -0.46172700 | 0.77067300  | -4.43214700 |
| H | 0.82803200  | -1.56740200 | 3.72230200  | H | -2.54031100 | 1.83313900  | -5.37156000 |
| H | -0.66281000 | 1.90400400  | 2.26736400  | H | -4.77472700 | 1.15684900  | -4.48289100 |
| H | -1.56158700 | 0.81769100  | 3.34105000  | C | -0.16068700 | -1.03609500 | -2.60406000 |
| H | -2.30108600 | -2.50387900 | -0.18508200 | O | 0.87443100  | -0.44034500 | -3.03692500 |
| H | -1.36220200 | -3.93779600 | 0.31589700  | C | -0.10493800 | -2.56879100 | -2.83459000 |
| H | -2.07743000 | -2.84246100 | 1.54114400  | F | 1.00492300  | -3.11908200 | -2.32348100 |
| C | -3.93974500 | -0.28358700 | -3.09944500 | F | -1.13628500 | -3.26501300 | -2.32879000 |
| C | -2.77833900 | -0.87268900 | -2.59906600 | F | -0.08614000 | -2.81628200 | -4.15024400 |
| C | -1.52084000 | -0.48875200 | -3.07793100 |   |             |             |             |

Optimized (SMD(DCM)/PBE0-GD3BJ/def2-TZVPP//SMD(DCM)/PBE0-GD3BJ/def2-svpp) Cartesian coordinates for **5**

|   |             |             |             |   |             |             |             |
|---|-------------|-------------|-------------|---|-------------|-------------|-------------|
| P | 0.03720300  | 0.00220800  | -0.03754600 | H | -2.88944600 | 1.39225400  | -1.12290100 |
| O | 0.06492300  | 0.01485600  | 1.57019400  | H | -2.25708000 | -0.77881700 | -1.66388600 |
| N | 0.15830200  | -0.02088300 | -2.82171800 | H | -1.89685500 | -2.50625200 | -1.75624200 |
| N | -0.85592000 | 1.28044300  | -0.56668000 | H | -0.97179100 | 2.98959400  | -1.74641600 |
| N | 1.64681600  | 0.03415600  | -0.39910800 | H | 0.66627200  | 2.35146200  | -1.53482000 |
| N | -0.63879800 | -1.43473200 | -0.49573500 | H | 2.20738200  | 1.14723600  | 1.29636200  |
| C | -0.72309200 | 0.84540900  | 2.42092500  | H | 2.73940300  | 1.86474700  | -0.25644100 |
| C | 2.13975600  | -0.66400500 | -1.58167500 | H | 3.54426700  | 0.40064600  | 0.39719900  |
| C | -1.83523600 | 0.24838100  | 3.06128300  | H | -1.57052000 | 1.05767100  | -3.20477000 |
| C | -2.25973100 | 1.42250800  | -0.21354400 | H | -0.09916700 | 1.82381600  | -3.84415300 |
| C | -1.43151700 | -1.50794300 | -1.71522500 | H | 0.12977000  | -2.07279600 | -3.10146300 |
| C | -3.72417600 | 0.21928500  | 4.64521800  | H | -1.24217500 | -1.23591100 | -3.85614900 |
| C | -0.38433400 | 2.05786000  | -1.70027400 | H | 1.97499800  | 0.96176600  | -2.99382800 |
| C | 2.57570700  | 0.91658000  | 0.28933600  | H | 1.96957900  | -0.65243700 | -3.73861500 |
| C | -2.62217400 | 0.85691400  | 4.09152900  | H | 0.48851700  | -2.48016400 | 0.93965700  |
| C | -2.27607100 | -1.05092800 | 2.65748600  | H | -1.01768000 | -3.28886500 | 0.43253200  |
| C | -4.13377500 | -1.05430500 | 4.22914200  | H | 0.40481900  | -3.27765000 | -0.65993800 |
| C | -0.50478400 | 1.24490300  | -2.99010700 | H | -2.35627300 | 1.84595100  | 4.46497900  |
| C | -0.58549700 | -1.24476400 | -2.96289100 | H | -4.28207400 | 0.73841700  | 5.43371500  |
| C | 1.59521900  | -0.06652700 | -2.87402400 | H | -5.00467500 | -1.54492400 | 4.67349700  |
| C | -0.16565200 | -2.68253300 | 0.07789200  | H | -3.66277000 | -2.67084400 | 2.86883300  |
| C | -3.38311100 | -1.67190000 | 3.22466900  | H | -1.71885000 | -1.57471000 | 1.87971800  |
| H | 3.23999500  | -0.62359200 | -1.56077700 | C | 0.00787200  | 2.04263000  | 2.78329500  |
| H | 1.86127000  | -1.73061100 | -1.52445200 | F | 0.44054700  | 2.76922400  | 1.70531400  |
| H | -2.58344000 | 0.60806400  | 0.45237100  | F | 1.19023600  | 1.83550100  | 3.47486400  |
| H | -2.43126700 | 2.37831900  | 0.31082000  | F | -0.69336200 | 2.89486900  | 3.54440900  |

Optimized (SMD(DCM)/PBE0-GD3BJ/def2-TZVPP//SMD(DCM)/PBE0-GD3BJ/def2-svpp) Cartesian coordinates for **TS2**

|   |            |            |            |   |            |            |            |
|---|------------|------------|------------|---|------------|------------|------------|
| P | 2.47280500 | 1.80858200 | 5.77815200 | N | 2.64660600 | 3.38315000 | 5.27311600 |
| O | 2.00638300 | 2.07913100 | 7.30384100 | N | 3.90101300 | 0.96954200 | 5.98983200 |
| N | 3.22491800 | 1.51448000 | 3.39389500 | C | 0.83460400 | 1.62995900 | 7.94490400 |
| N | 1.27621800 | 0.86746000 | 5.12354700 | C | 3.60067300 | 3.72689800 | 4.22497400 |

|   |             |             |             |   |             |            |             |
|---|-------------|-------------|-------------|---|-------------|------------|-------------|
| C | 1.03298100  | 0.73093800  | 9.04126600  | H | 3.09157700  | 0.32463700 | 8.49030900  |
| C | 0.98089400  | -0.43810800 | 5.69264600  | C | -0.30221200 | 2.41976900 | 7.68530800  |
| C | 4.33247100  | 0.05378900  | 4.94938000  | F | -1.47386900 | 1.92486200 | 8.07336800  |
| C | 0.30614300  | -0.48563700 | 11.04228400 | F | -0.42728800 | 2.88357200 | 6.43149800  |
| C | 0.90224200  | 1.07876800  | 3.73972800  | F | -0.35785700 | 3.81267600 | 8.40058700  |
| C | 2.17460200  | 4.53065200  | 6.04029900  | C | -0.41769000 | 3.93760000 | 11.18281100 |
| C | 0.04395500  | 0.40687900  | 10.00982800 | C | 1.73738500  | 4.99619000 | 9.87552600  |
| C | 2.29624800  | 0.09962900  | 9.20423900  | C | -0.71348400 | 6.17057700 | 9.66759400  |
| C | 1.55459600  | -1.10282000 | 11.17918800 | C | 0.17132500  | 4.92809200 | 10.09849300 |
| C | 2.10455200  | 0.77099500  | 2.85298600  | C | -1.52299500 | 2.22921700 | 13.15179400 |
| C | 4.45759700  | 0.78756500  | 3.61705300  | C | -0.20708800 | 2.67532500 | 13.26793900 |
| C | 3.33663800  | 2.89712300  | 2.98539800  | C | 0.33495500  | 3.51307500 | 12.29063200 |
| C | 4.93565500  | 1.57020500  | 6.81597100  | C | -1.74739500 | 3.48293900 | 11.09814300 |
| C | 2.54381900  | -0.79236400 | 10.24381500 | C | -2.29389500 | 2.63457600 | 12.05875000 |
| H | 3.48291000  | 4.79696600  | 3.99422300  | C | 2.39067900  | 6.21807500 | 9.63306800  |
| H | 4.64085700  | 3.58677800  | 4.57892400  | C | 3.77653300  | 6.29309600 | 9.47797700  |
| H | 1.53979000  | -0.59546000 | 6.62718100  | C | 4.54969800  | 5.13414300 | 9.55894200  |
| H | -0.09489000 | -0.52244200 | 5.92466600  | C | -2.35713100 | 7.89147200 | 10.23980300 |
| H | 1.26073100  | -1.24405500 | 4.98768700  | C | -2.24318000 | 8.44865000 | 8.96654400  |
| H | 3.60901900  | -0.77479200 | 4.85819200  | C | -1.36878500 | 7.87434300 | 8.03961600  |
| H | 5.29226200  | -0.39371500 | 5.25252200  | C | -0.61140300 | 6.75910900 | 8.39268300  |
| H | 0.03923400  | 0.43601900  | 3.50507000  | C | -1.60705700 | 6.76213200 | 10.57674500 |
| H | 0.57686900  | 2.12392800  | 3.59811400  | C | 2.54314700  | 3.84498500 | 9.95535000  |
| H | 1.55834400  | 4.21892100  | 6.88744300  | C | 3.92641500  | 3.90687700 | 9.79854600  |
| H | 1.57945000  | 5.19657000  | 5.39013200  | H | 4.52205900  | 2.99099600 | 9.86734000  |
| H | 3.03431900  | 5.09916800  | 6.43926800  | H | 5.63701700  | 5.18677900 | 9.43939100  |
| H | 2.33360100  | -0.30593100 | 2.90378500  | H | 4.25557900  | 7.26112000 | 9.29729100  |
| H | 1.90927900  | 1.02089500  | 1.79326700  | H | 1.80148800  | 7.13890500 | 9.57459200  |
| H | 5.28847700  | 1.50946300  | 3.67231600  | H | 2.07362700  | 2.87334300 | 10.13090400 |
| H | 4.68286300  | 0.08381300  | 2.79332100  | H | -1.71563200 | 6.33258300 | 11.57831400 |
| H | 2.37701700  | 3.20906000  | 2.54366800  | H | 0.06820400  | 6.32161300 | 7.65419100  |
| H | 4.12497900  | 3.05319200  | 2.22410700  | H | -3.03872000 | 8.33406300 | 10.97376200 |
| H | 4.49385900  | 2.32601800  | 7.48216400  | H | -2.83498200 | 9.32872700 | 8.69412800  |
| H | 5.41109500  | 0.79933000  | 7.44746200  | H | -1.27688600 | 8.30294100 | 7.03605300  |
| H | 5.72015100  | 2.05958300  | 6.20704200  | H | 1.37067000  | 3.85049000 | 12.39911500 |
| H | -0.94061900 | 0.87263800  | 9.96281200  | H | 0.40487800  | 2.36362100 | 14.12066900 |
| H | -0.48831400 | -0.69421800 | 11.76731900 | H | -1.94936000 | 1.56533200 | 13.91106600 |
| H | 1.75078800  | -1.80140200 | 11.99801600 | H | -3.32757000 | 2.28727900 | 11.95856800 |
| H | 3.53574600  | -1.25184600 | 10.32236900 | H | -2.36304300 | 3.79177800 | 10.24762300 |

Optimized (SMD(DCM)/PBE0-GD3BJ/def2-TZVPP//SMD(DCM)/PBE0-GD3BJ/def2-svpp) Cartesian coordinates for 6

|   |            |            |            |   |            |             |             |
|---|------------|------------|------------|---|------------|-------------|-------------|
| P | 2.79629500 | 1.51008800 | 5.18447400 | C | 0.80643100 | -0.19488500 | 5.82752000  |
| F | 0.93787900 | 3.49377800 | 6.74113100 | C | 3.88203100 | -0.43246100 | 3.69395600  |
| O | 2.97386100 | 1.53294800 | 6.85482200 | C | 1.24892100 | -0.49845800 | 10.81181400 |
| F | 0.21743300 | 2.91780300 | 8.69132500 | C | 0.40983500 | 1.40977800  | 4.01019900  |
| N | 2.59070300 | 1.47973700 | 3.07953100 | C | 3.76680400 | 3.98611400  | 5.98097000  |
| N | 1.16808100 | 1.06583800 | 5.19317700 | C | 1.07031900 | 0.35839200  | 9.72784800  |
| N | 3.24439500 | 3.10890600 | 4.94397100 | C | 1.10265800 | 2.67292700  | 7.75206000  |
| N | 3.93162000 | 0.29858700 | 4.94527400 | C | 3.45810800 | 0.38091300  | 9.36225100  |
| C | 2.03461200 | 1.71100600 | 7.82797000 | C | 2.52848700 | -0.91892900 | 11.17690200 |
| C | 3.66646800 | 3.52656900 | 3.61962400 | C | 1.23731800 | 0.96223900  | 2.82038300  |
| C | 2.17564500 | 0.81611400 | 8.99352700 | C | 3.65888900 | 0.58891100  | 2.60312700  |

|   |             |             |             |   |            |             |             |
|---|-------------|-------------|-------------|---|------------|-------------|-------------|
| C | 2.74954000  | 2.86694100  | 2.62537100  | H | 1.28022600 | -0.13740300 | 2.79023100  |
| C | 4.78463200  | -0.23174900 | 5.99461500  | H | 0.86727800 | 1.32867700  | 1.84927900  |
| C | 3.63184200  | -0.47778000 | 10.44518100 | H | 4.57231500 | 1.18820600  | 2.47151700  |
| H | 3.58014000  | 4.62211600  | 3.54117300  | H | 3.38287600 | 0.14140100  | 1.63426000  |
| H | 4.72891300  | 3.26557200  | 3.44042400  | H | 1.76434000 | 3.35422600  | 2.65211300  |
| H | 1.56501900  | -0.49642300 | 6.56453400  | H | 3.13262300 | 2.89789700  | 1.59290400  |
| H | -0.15610100 | -0.08776400 | 6.35694300  | H | 5.14142000 | 0.57186800  | 6.65217800  |
| H | 0.71505200  | -1.01167800 | 5.08600700  | H | 4.27957400 | -0.99668200 | 6.61329200  |
| H | 3.09120500  | -1.20846800 | 3.69489300  | H | 5.66489700 | -0.69534100 | 5.51937200  |
| H | 4.84270900  | -0.94542500 | 3.53225300  | H | 0.05950700 | 0.65941800  | 9.44378200  |
| H | -0.56676500 | 0.90450100  | 4.03602500  | H | 0.37547300 | -0.84866200 | 11.37031100 |
| H | 0.21772900  | 2.49651500  | 3.97945800  | H | 2.66468900 | -1.59411500 | 12.02709200 |
| H | 3.48339400  | 3.65935000  | 6.98579300  | H | 4.63989800 | -0.80170300 | 10.72172600 |
| H | 3.37192100  | 5.00463900  | 5.82274300  | H | 4.32542400 | 0.72736900  | 8.79630100  |
| H | 4.87179200  | 4.02928100  | 5.93247600  |   |            |             |             |

Optimized (SMD(DCM)/PBE0-GD3BJ/def2-TZVPP//SMD(DCM)/PBE0-GD3BJ/def2-svpp) Cartesian coordinates for 7

|   |             |              |             |
|---|-------------|--------------|-------------|
| F | -1.61222600 | -6.74007800  | 13.13567000 |
| C | -3.06782100 | -6.37161400  | 15.13794200 |
| C | -1.10417800 | -8.21295000  | 15.09602500 |
| C | -0.48752900 | -5.59501800  | 15.05705100 |
| B | -1.56941700 | -6.72942300  | 14.59043400 |
| C | -5.66460400 | -5.64003900  | 16.04588100 |
| C | -4.79351000 | -6.34179000  | 16.88170900 |
| C | -3.52241300 | -6.70168800  | 16.42628700 |
| C | -3.96931200 | -5.66964400  | 14.31853300 |
| C | -5.24543800 | -5.30745200  | 14.75592700 |
| C | -0.52294600 | -8.45561900  | 16.35260100 |
| C | -0.17519900 | -9.74100700  | 16.77631100 |
| C | -0.39206700 | -10.83701400 | 15.93877800 |
| C | 0.44694600  | -4.02800900  | 16.69778100 |
| C | 1.48599700  | -3.69322100  | 15.82736700 |
| C | 1.54046700  | -4.30169500  | 14.57125700 |
| C | 0.56904900  | -5.23491200  | 14.20198700 |
| C | -0.52044300 | -4.95903700  | 16.31001100 |
| C | -1.30562600 | -9.33550800  | 14.27392600 |
| C | -0.95796900 | -10.62629000 | 14.67946700 |
| H | -1.12890400 | -11.47593000 | 14.00841100 |
| H | -0.11758200 | -11.84662000 | 16.26276000 |
| H | 0.27589900  | -9.88814400  | 17.76420600 |
| H | -0.32239200 | -7.61014200  | 17.02150700 |
| H | -1.74680300 | -9.18997700  | 13.28142100 |
| H | -1.33640500 | -5.18847200  | 17.00562100 |
| H | 0.62793100  | -5.70056000  | 13.21162000 |
| H | 0.38540500  | -3.55394200  | 17.68396800 |
| H | 2.24459400  | -2.96076900  | 16.12347900 |
| H | 2.34712500  | -4.04605900  | 13.87460700 |
| H | -2.86645900 | -7.27054300  | 17.09619400 |
| H | -5.11036200 | -6.61795300  | 17.89383200 |
| H | -6.66386400 | -5.35913300  | 16.39541700 |
| H | -5.91993800 | -4.76226400  | 14.08567500 |
| H | -3.65910800 | -5.40305900  | 13.30201500 |

# References

1. Tang, J.-s.; Verkade, J. G., An improved synthesis of the strong base P(MeNCH<sub>2</sub>CH<sub>2</sub>)<sub>3</sub>N. *Tetrahedron Letters* **1993**, 34 (18), 2903-2904.
2. Brown, H. C.; Racherla, U. S., Organoboranes. 44. A convenient, highly efficient synthesis of triorganylboranes via a modified organometallic route. *The Journal of Organic Chemistry* **1986**, 51 (4), 427-432.
3. Johnstone, T. C.; Briceno-Strocchia, A. I.; Stephan, D. W., Frustrated Lewis Pair Oxidation Permits Synthesis of a Fluoroazaphosphatrane, [FP(MeNCH<sub>2</sub>CH<sub>2</sub>)<sub>3</sub>N](). *Inorganic chemistry* **2018**.
4. Spyros, A.; Dais, P., <sup>31</sup>P NMR spectroscopy in food analysis. *Progress in Nuclear Magnetic Resonance Spectroscopy* **2009**, 54 (3-4), 195-207.
5. <sup>19</sup>F NMR and UV studies of xenon difluoride solution-vessel stability and its relevance to the fluorination of organic substrates. *Arkivoc* **2011**, 2011 (10), 221.
6. Peng, P.; Wu, J.-j.; Liang, J.-q.; Zhang, T.-y.; Huang, J.-w.; Wu, F.-h., Lithium triethylborohydride-promoted generation of  $\alpha,\alpha$ -difluoroenolates from 2-iodo-2,2-difluoroacetophenones: an unprecedented utilization of lithium triethylborohydride. *RSC Advances* **2017**, 7 (88), 56034-56037.
7. Frisch, M. J.; Trucks, G. W.; Schlegel, H. B.; Scuseria, G. E.; Robb, M. A.; Cheeseman, J. R.; Scalmani, G.; Barone, V.; Petersson, G. A.; Nakatsuji, H.; X. Li, M. C.; Marenich, A.; Bloino, J.; Janesko, B. G.; Gomperts, R.; Mennucci, B.; Hratchian, H. P.; Ortiz, J. V.; Izmaylov, A. F.; Sonnenberg, J. L.; Williams-Young, D.; Ding, F.; Lipparini, F.; Egidi, F.; Goings, J.; Peng, B.; Petrone, A.; Henderson, T.; Ranasinghe, D.; Zakrzewski, V. G.; Gao, J.; Rega, N.; Zheng, G.; Liang, W.; Hada, M.; Ehara, M.; Toyota, K.; Fukuda, R.; Hasegawa, J.; Ishida, M.; Nakajima, T.; Honda, Y.; Kitao, O.; Nakai, H.; Vreven, T.; Throssell, K.; J. A. Montgomery, J.; Peralta, J. E.; Ogliaro, F.; Bearpark, M.; Heyd, J. J.; Brothers, E.; Kudin, K. N.; Staroverov, V. N.; Keith, T.; Kobayashi, R.; Normand, J.; Raghavachari, K.; Rendell, A.; Burant, J. C.; Iyengar, S. S.; Tomasi, J.; Cossi, M.; Millam, J. M.; Klene, M.; Adamo, C.; Cammi, R.; Ochterski, J. W.; Martin, R. L.; Morokuma, K.; Farkas, O.; Foresman, J. B.; Fox, D. J. *Gaussian 09, Revision E.01.*, Gaussian Inc., : Wallingford CT, 2016.
8. Grimme, S.; Ehrlich, S.; Goerigk, L., Effect of the damping function in dispersion corrected density functional theory. *Journal of Computational Chemistry* **2011**, 32 (7), 1456-1465.
